# Supplementary material
Source: MDPI journal article supplement (https://www.mdpi.com/2673-4079/3/3/18)
Supplement: s1 [file s1]

## Supporting information

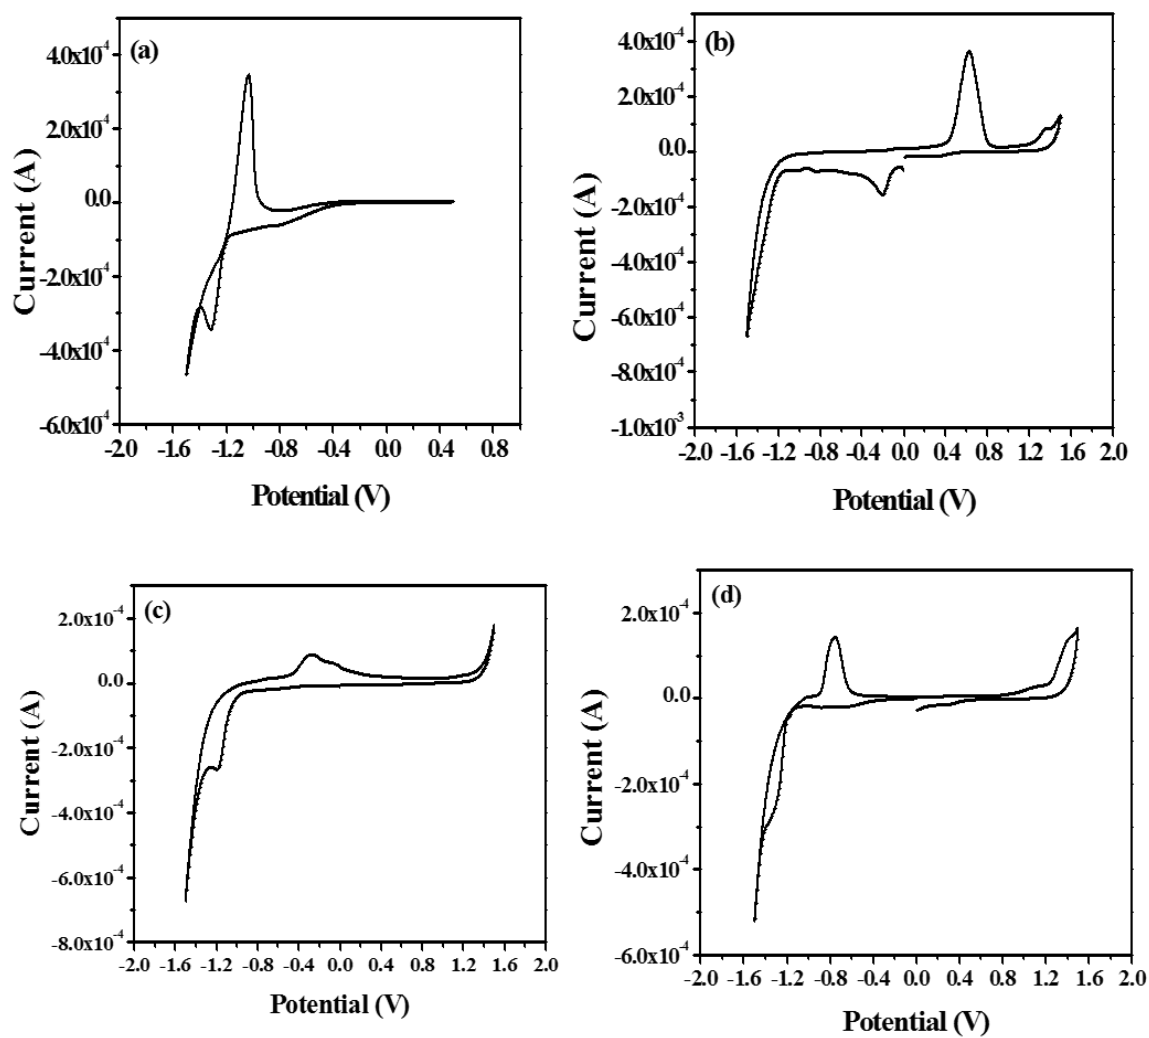

Figure S1: Cyclic voltammogram of individual metal ions in 1M KOH (a) 2 mM  $\text{CoSO}_4$  (b) 2 mM  $\text{CuSO}_4$  (c) 4 mM  $\text{FeSO}_4$  (d) 2 mM  $\text{ZnSO}_4$ .

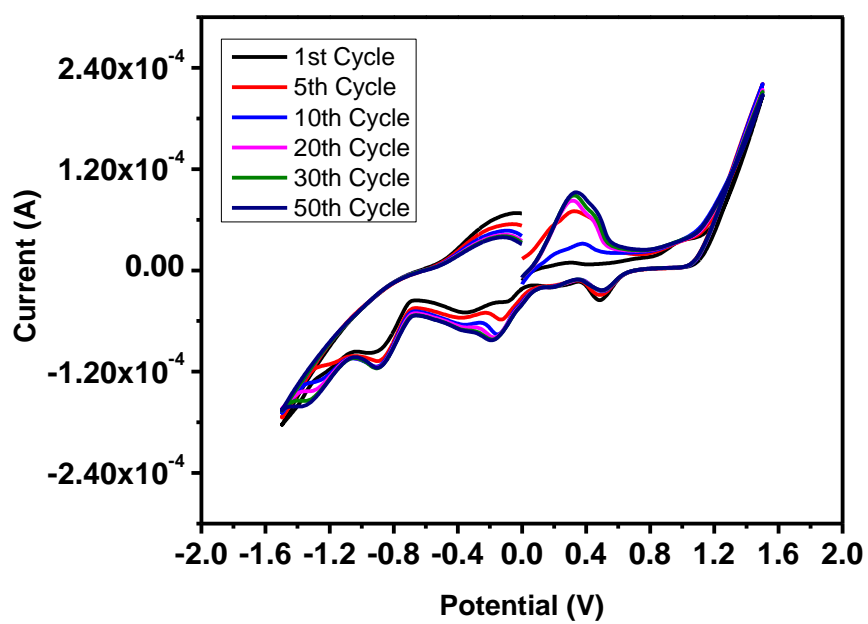

Figure S2: Effect of scan cycles on the oxidation/reduction peaks of Co, Cu, Fe & Zn in 1M KOH at a scan rate of  $100 \text{ mVs}^{-1}$ .

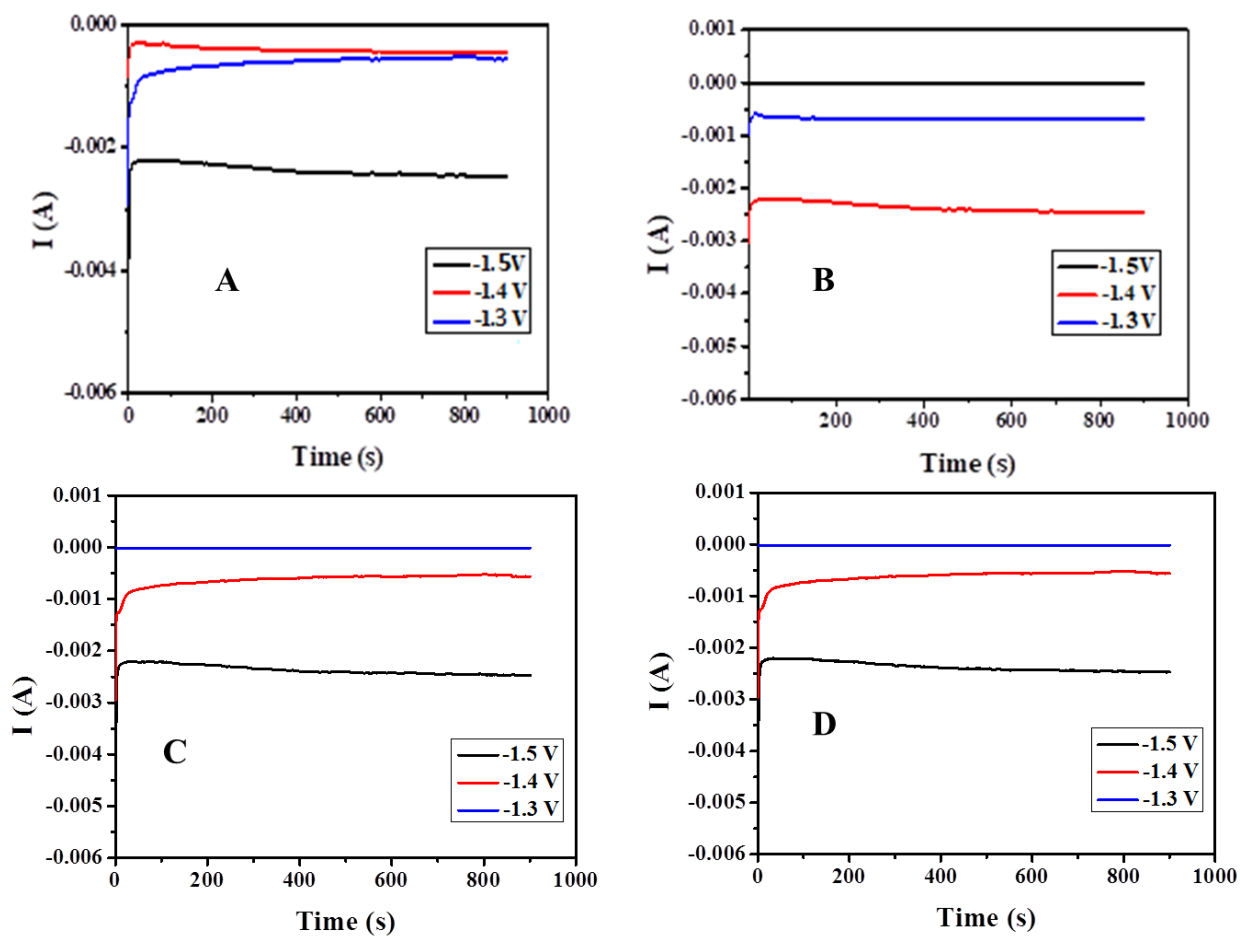

Figure S3: In-situ deposition of (a) cobalt, (b) copper, (c) iron, (d) zinc ions on FTO at different values of deposition potentials in 1 M KOH as supporting electrolyte for a deposition time of 900 sec.

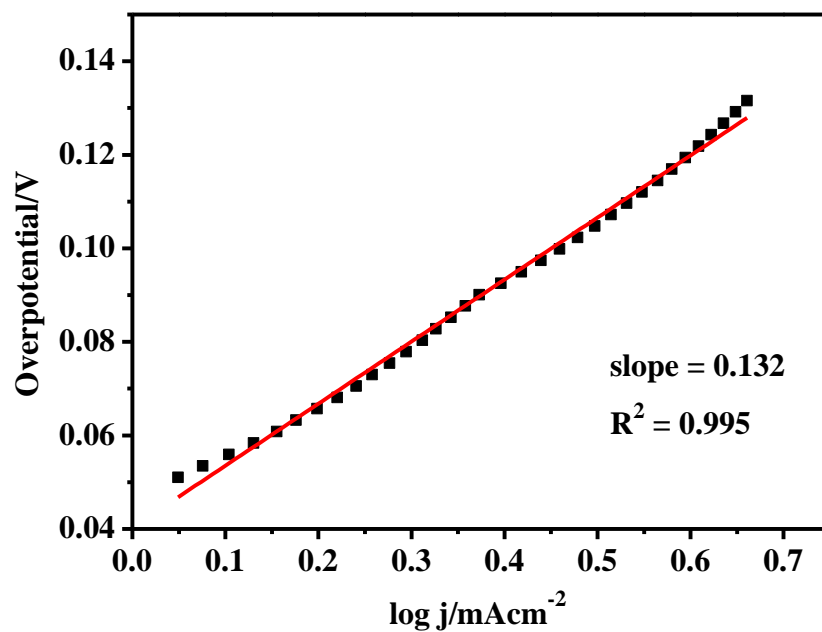

Figure S4: Tafel plot using data obtained at a scan rate of 10 mV/sec in 1 M KOH at the FTO modified with Co-Cu-Zn-Fe
